# Supplementary material for: Distribution, Transfer, and Health Risk of Organochlorine Pesticides in Soil and Water of the Huangshui River Basin
Source: MDPI journal article supplement (doi:10.3390/toxics11121024), 2023-12-15
Supplement: s1 [file s1]

**Supplementary materials**

# **Distribution, Transfer, and Health Risk of Organochlorine Pesticides in Soil and Water of the Huangshui River Basin**

**Ruyue Yu <sup>1</sup>, Yang Zhou <sup>2</sup>, Shengxian Xu <sup>1</sup>, Jing Jing <sup>2</sup>, Hongyan Zhang <sup>2</sup> and Yuanfang Huang <sup>1,\*</sup>**

<sup>1</sup> College of Land Science and Technology, China Agricultural University, Beijing 100193, China

<sup>2</sup> Innovation Center of Pesticide Research, Department of Applied Chemistry, College of Science, China Agricultural University, Beijing 100193, China

\* Correspondence: yfhuang@cau.edu.cn

Number of pages (including this page): 5

Number of tables: 4

**Table S1.** Method validation results (retention time, LOQ, calibration curves, R<sup>2</sup>, recoveries and RSD) of HCHs and DDTs with GC–ECD.

| Compounds | Retention time (min) | LOQs (µg kg <sup>-1</sup> ) | Calibration curve (R <sup>2</sup> ) | Recovery, % (RSD, %)         |                             |                            |
|-----------|----------------------|-----------------------------|-------------------------------------|------------------------------|-----------------------------|----------------------------|
|           |                      |                             |                                     | 0.005 (mg kg <sup>-1</sup> ) | 0.01 (mg kg <sup>-1</sup> ) | 0.1 (mg kg <sup>-1</sup> ) |
| α-HCH     | 9.516                | 1                           | y = 156231002x - 370200 (0.9970)    | 71 (4.2)                     | 81 (2.5)                    | 89(3.2)                    |
| γ-HCH     | 10.601               | 1                           | y = 49347885x + 12455 (0.9987)      | 88 (5.9)                     | 99(8.3)                     | 96(9.8)                    |
| β-HCH     | 10.715               | 1                           | y = 131586543x - 232658 (0.9983)    | 74 (8.5)                     | 77 (4.9)                    | 81 (2.3)                   |
| δ-HCH     | 11.636               | 1                           | y = 83642218x – 148780 (0.9987)     | 83 (7.6)                     | 92 (3.4)                    | 97 (6.8)                   |
| P,P'-DDE  | 17.402               | 1                           | y = 101191927x - 204641 (0.9980)    | 92 (11.2)                    | 98 (4.7)                    | 96 (2.2)                   |
| O,P'-DDT  | 19.198               | 1                           | y = 72995934 x – 57290 (0.9999)     | 78 (7.4)                     | 96 (2.4)                    | 105 (2.7)                  |
| P,P'-DDD  | 19.319               | 1                           | y = 29462970x - 7246 (0.9986)       | 80 (7.6)                     | 99 (5.6)                    | 101 (6.4)                  |
| P,P'-DDT  | 21.083               | 1                           | y = 21590633x - 42932 (0.9939)      | 73 (11.0)                    | 82 (8.2)                    | 97 (2.3)                   |

**Table S2.** Parameters required to construct a fugacity model for the Huangshui River Basin.

| Parameters                                         |                      | Value    | Unit                   |
|----------------------------------------------------|----------------------|----------|------------------------|
| Basic physical and chemical properties of p,p'-DDE | Molar mass           | 3.18E+02 | g/mol                  |
|                                                    | Log Kow              | 5.86E+00 |                        |
|                                                    | Data temperature     | 5.50E+00 | °C                     |
|                                                    | Melting point        | 8.90E+01 | °C                     |
|                                                    | Vapor pressure       | 2.51E-04 | Pa                     |
|                                                    | Solubility in water  | 4.37E-05 | g/m <sup>3</sup>       |
|                                                    | Henry's law constant | 6.31E+00 | Pa m <sup>3</sup> /mol |
| Half-lives of p,p'-DDE                             | In air               | 1.70E+02 | h                      |
|                                                    | In aerosol           | 1.70E+02 | h                      |
|                                                    | In water             | 1.70E+04 | h                      |
|                                                    | In susp. particles   | 5.50E+04 | h                      |
|                                                    | In fish              | 5.50E+04 | h                      |

|                                         |                          |          |                   |
|-----------------------------------------|--------------------------|----------|-------------------|
| Volume fractions of environmental phase | In soil                  | 5.50E+04 | h                 |
|                                         | in sediment              | 5.50E+04 | h                 |
|                                         | Aerosol in air           | 4.50E-10 |                   |
|                                         | Susp. particles in water | 5.54E-04 |                   |
|                                         | Fish in water            | 1.00E-06 |                   |
|                                         | Soil in water            | 2.00E-01 |                   |
|                                         | Water in soil            | 2.00E-01 |                   |
|                                         | Solids in soil           | 6.00E-01 |                   |
|                                         | Water in sediment        | 7.00E-01 |                   |
|                                         | Solids in sediment       | 3.00E-01 |                   |
| Area of environmental phase             | Air                      | 2.54E+10 | m <sup>3</sup>    |
|                                         | Water                    | 1.07E+08 | m <sup>3</sup>    |
|                                         | Soil                     | 1.05E+10 | m <sup>3</sup>    |
|                                         | Sediment                 | 1.07E+08 | m <sup>3</sup>    |
| Depth of environmental phase            | Air                      | 6.00E+02 | m                 |
|                                         | Water                    | 5.00E+00 | m                 |
|                                         | Soil                     | 1.00E-01 | m                 |
|                                         | Sediment                 | 2.00E-02 | m                 |
| Advective flow residence times          | Air                      | 3.00E+01 |                   |
|                                         | Water                    | 8.00E+02 |                   |
|                                         | Sediment                 | 5.00E+04 |                   |
| Densities for sub-compartments          | Air in air               | 1.19E+00 | kg/m <sup>3</sup> |
|                                         | Aerosol in air           | 1.50E+03 | kg/m <sup>3</sup> |
|                                         | Water in air             | 1.00E+03 | kg/m <sup>3</sup> |
|                                         | Susp. particles in water | 2.40E+03 | kg/m <sup>3</sup> |

|                      |                                |          |                   |
|----------------------|--------------------------------|----------|-------------------|
| Organic carbon       | Fish in water                  | 1.00E+03 | kg/m <sup>3</sup> |
|                      | Air in soil                    | 1.19E+00 | kg/m <sup>3</sup> |
|                      | Water in soil                  | 9.00E+02 | kg/m <sup>3</sup> |
|                      | Solid in soil                  | 2.80E+03 | kg/m <sup>3</sup> |
|                      | Water in sediment              | 1.00E+03 | kg/m <sup>3</sup> |
|                      | Solid in sediment              | 2.26E+03 | kg/m <sup>3</sup> |
|                      | Susp. particles                | 2.60E-03 | g/g               |
|                      | Fish lipid                     | 4.80E-02 | g/g               |
|                      | Soil                           | 3.00E-02 | g/g               |
|                      | Sediment                       | 2.00E-03 | g/g               |
| Transport velocities | Air side air–water MTC         | 5.00E+00 | m/h               |
|                      | Water side air–water MTC       | 5.00E-02 | m/h               |
|                      | Rain rate                      | 4.55E-05 | (m/h)             |
|                      | Aerosol dry deposition         | 1.08E+01 | (m/h)             |
|                      | Soil–air phase diffusion MTC   | 2.00E-02 | (m/h)             |
|                      | Soil–water phase diffusion MTC | 1.00E-05 | (m/h)             |
|                      | Soil–air boundary layer MTC    | 5.00E+00 | (m/h)             |
|                      | Sediment–water diffusion MTC   | 1.00E-04 | (m/h)             |
|                      | Sediment deposition            | 1.00E-06 | (m/h)             |
|                      | Sediment resuspension          | 2.00E-07 | (m/h)             |
| Emission rate        | Soil–water runoff rate         | 1.50E-05 | (m/h)             |
|                      | Soil–solids runoff rate        | 1.00E-08 | (m/h)             |
|                      | Scavenging ratio               | 2.00E+04 |                   |
|                      | Into air                       | 8.31E-06 | kg/h              |
|                      | Into water                     | 8.14E-04 | kg/h              |
|                      | Into soil                      | 8.53E-02 | kg/h              |

|                                 |                        |       |                   |
|---------------------------------|------------------------|-------|-------------------|
| Advective inflow concentrations | Into sediment          | 0     | kg/h              |
|                                 | Concentration in air   | 0.443 | ng/m <sup>3</sup> |
|                                 | Concentration in water | 154   | ng/L              |

**Table S3.** SF and RfD values (children) of the compounds detected in Huangshui River Basin.

| Children      | C    | IR | EF  | ED | BW | AT   | CDI      | SF   | RfD      |
|---------------|------|----|-----|----|----|------|----------|------|----------|
| $\alpha$ -HCH | 0.75 | 1  | 350 | 6  | 30 | 2190 | 2.40E-02 | 6.3  | 5.00E-04 |
| $\beta$ -HCH  | 0.64 | 1  | 350 | 6  | 30 | 2190 | 2.05E-02 | 1.8  | 2.00E-04 |
| $\gamma$ -HCH | 1.6  | 1  | 350 | 6  | 30 | 2190 | 5.11E-02 | 1.1  | 3.00E-04 |
| p,p'-DDE      | 0.8  | 1  | 350 | 6  | 30 | 2190 | 2.56E-02 | 0.34 | 7.00E-04 |
| p,p'-DDD      | 0.69 | 1  | 350 | 6  | 30 | 2190 | 2.21E-02 | 0.24 | 2.00E-03 |
| p,p'-DDT      | 0.57 | 1  | 350 | 6  | 30 | 2190 | 1.82E-02 | 0.34 | 5.00E-04 |

**Table S4.** SF and RfD values (adult) of the compounds detected in Huangshui River Basin.

| Adult         | C    | IR | EF  | ED | BW | AT    | CDI      | SF   | RfD      |
|---------------|------|----|-----|----|----|-------|----------|------|----------|
| $\alpha$ -HCH | 0.75 | 2  | 350 | 30 | 70 | 25500 | 8.82E-03 | 6.3  | 5.00E-04 |
| $\beta$ -HCH  | 0.64 | 2  | 350 | 30 | 70 | 25500 | 7.53E-03 | 1.8  | 2.00E-04 |
| $\gamma$ -HCH | 1.6  | 2  | 350 | 30 | 70 | 25500 | 1.88E-02 | 1.1  | 3.00E-04 |
| p,p'-DDE      | 0.8  | 2  | 350 | 30 | 70 | 25500 | 9.41E-03 | 0.34 | 7.00E-04 |
| p,p'-DDD      | 0.69 | 2  | 350 | 30 | 70 | 25500 | 8.12E-03 | 0.24 | 2.00E-03 |
| p,p'-DDT      | 0.57 | 2  | 350 | 30 | 70 | 25500 | 6.71E-03 | 0.34 | 5.00E-04 |
